# Supplementary material
Source: MDPI journal article supplement (https://www.mdpi.com/1999-4907/11/2/193)
Supplement: s1 [file s1]

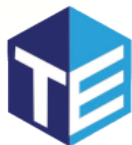

**TOPEDIT SCIENTIFIC EDITING**

**CERTIFICATE OF ENGLISH EDITING**

This certificate confirms that the manuscript listed below was edited by one or more expert English editors with a PhD. The following issues were corrected: grammar, spelling, punctuation, sentence structure, and phrasing. Journal editors can contact us for a copy of the edited document that was submitted to the authors.

**Manuscript Title**

Selection and validation of appropriate reference genes for real-time quantitative PCR analysis in *Larix olgensis* Henry under abiotic stresses

**Date Issued**

2020-01-04

**Certificate Number**

1318-08-0104-01

TopEdit specializes in the comprehensive preparation of scientific manuscripts that are targeted for publication in English language journals. We provide editing, technical translation, formatting, and illustration services for technical manuscripts, grant proposals, conference presentations and posters, and professional school application essays and other scientific materials. All orders are edited by one or more editors who hold advanced Ph.D. degrees and are either natively proficient in English or are native speakers.
